# 1 **Urban-adapted mammal species have more known pathogens**

2 Gregory F. Albery\*<sup>1</sup>; Colin J. Carlson<sup>2,3</sup>; Lily E. Cohen<sup>4</sup>, Evan A. Eskew<sup>5</sup>; Rory Gibb<sup>6,7</sup>; Sadie J.  
3 Ryan<sup>8,9,10</sup>; Amy R. Sweeny<sup>11</sup>; Daniel J. Becker<sup>12</sup>

- 4 1. Department of Biology, Georgetown University, Washington D.C., 20007  
5 2. Center for Global Health Science and Security, Georgetown University Medical Center, Washington,  
6 D.C., 20007  
7 3. Department of Microbiology and Immunology, Georgetown University Medical Center, Washington,  
8 D.C., 20007  
9 4. Icahn School of Medicine at Mount Sinai, New York, NY, 10029  
10 5. Department of Biology, Pacific Lutheran University, Tacoma, WA, 98447  
11 6. Centre for Mathematical Modelling of Infectious Diseases, London School of Hygiene and Tropical  
12 Medicine, London, UK.  
13 7. Centre on Climate Change and Planetary Health, London School of Hygiene and Tropical Medicine,  
14 London, UK.  
15 8. Quantitative Disease Ecology and Conservation (QDEC) Lab Group, Department of Geography,  
16 University of Florida, Gainesville, FL, 32610 USA  
17 9. Emerging Pathogens Institute, University of Florida, Gainesville, FL, 32610 USA  
18 10. School of Life Sciences, University of KwaZulu-Natal, Durban, 4041, South Africa  
19 11. University of Edinburgh, Ashworth Laboratories, Edinburgh EH9  
20 12. Department of Biology, University of Oklahoma, OK, 73019 USA

21 \* [gfalbery@gmail.com](mailto:gfalbery@gmail.com)

## 22 **Abstract**

23 The world is rapidly urbanising, inviting mounting concern that urban environments will experience  
24 increased zoonotic disease risk. Urban animals could have more frequent contact with humans, and  
25 therefore may transmit more zoonotic parasites; however, these animals have a specific set of  
26 underlying traits that may determine their parasite burdens while predisposing them to urban living,  
27 and they may be subject to more intense research effort, both of which could complicate our ability to  
28 reliably identify the role of urbanisation in driving zoonotic risk. Here, we test whether urban  
29 mammal species host more known zoonotic parasites, investigating the potential underlying drivers  
30 while accounting for a correlated suite of phenotypic, taxonomic, and geographic predictors. We  
31 found that urban-adapted mammals have more documented parasites, and more zoonotic parasites  
32 specifically: despite comprising only 157 of the 2792 investigated species (6%), urban mammals  
33 provided 39% of known host-parasite combinations and showed consistently higher viral discovery  
34 rates throughout the last century. However, contrary to predictions, much of the observed effect was  
35 attributable to research effort rather than to urban adaptation status itself, and urban-adapted species in  
36 fact hosted fewer zoonoses than expected given their total observed parasite richness. We conclude  
37 that extended historical contact with humans has had a limited impact on the number of observed  
38 zoonotic parasites in urban-adapted mammals; instead, their greater observed zoonotic richness likely  
39 reflects sampling bias arising from proximity to humans, which supports a near-universal underlying

40 pattern of conflation between zoonotic risk, research effort, and synanthropy. These findings  
41 underscore the need to resolve the ecological mechanisms underlying links between anthropogenic  
42 change, sampling bias, and observed wildlife disease dynamics.

### 43 **Authorship Statement**

44 GFA and DJB conceived the study, and GFA analysed the data and wrote the manuscript. All other  
45 authors offered thoughts on the analysis and commented on the manuscript.

### 46 **Data and Code Availability**

47 The code used here is available at [github.com/gfalbery/UrbanOutputters](https://github.com/gfalbery/UrbanOutputters). The CLOVER dataset is  
48 available at [github.com/viralemergence/clover](https://github.com/viralemergence/clover).

### 49 **Acknowledgements**

50 This work was supported by funding to the Viral Emergence Research Initiative (VERENA)  
51 consortium, including NSF BII 2021909.

## 52 **Introduction**

53 As the rate of infectious disease emergence continues to rise, it is becoming increasingly important to  
54 identify and understand the drivers of zoonotic risk in wild animals (Jones *et al.* 2008; Keesing *et al.*  
55 2010; Morse *et al.* 2012). Humans are rapidly altering patterns of wildlife disease through a  
56 combination of climate change and land conversion, both of which are expected to drive increased  
57 spillover (i.e., interspecific transmission of parasites from animals into humans (Jones *et al.* 2008;  
58 Keesing *et al.* 2010; Loh *et al.* 2015; Hassell *et al.* 2017; Carlson *et al.* 2020a; Cohen *et al.* 2020;  
59 Gibb *et al.* 2020)). Urban environments in particular are expected to facilitate the emergence of  
60 zoonotic pathogens in wildlife (Keesing *et al.* 2010; Hassell *et al.* 2017; Becker *et al.* 2018; Murray *et*  
61 *al.* 2019; Werner & Nunn 2020), through a combination of impaired immune systems fed by  
62 anthropogenic resources (Becker *et al.* 2015, 2018) and greater pollution (Becker *et al.* 2020a) as well  
63 as increased proximity of wild animals to humans (Hassell *et al.* 2017; Albery & Becker 2021). This  
64 combination of factors is likely to become even more problematic in the future as the world's  
65 population continues to rapidly grow and urbanize (Seto *et al.* 2012; Chen *et al.* 2020; Gao & O'Neill  
66 2020).

67 Previous meta-analyses have uncovered elevated stressors and greater parasite burdens or parasite  
68 diversity in urban animals, with the general expectation that the urban environment weakens host  
69 immune responses (Murray *et al.* 2019; Gibb *et al.* 2020; Werner & Nunn 2020). However, these  
70 studies usually comprise relatively few examples spread across a small selection of animal species,  
71 reducing their ability to generally address the question of how urbanisation affects zoonotic disease  
72 risk. Moreover, the results of such analyses have been equivocal, with both positive, negative, and  
73 neutral effects of urban living on dimensions of wildlife disease (Murray *et al.* 2019; Gibb *et al.* 2020;  
74 Werner & Nunn 2020). Testing whether urban-adapted mammal species exhibit greater zoonotic risk  
75 in a broad-scale, pan-mammalian analysis could provide more general answers to this question,  
76 informing the design of parasite sampling regimes and efforts to mitigate zoonotic disease risk in  
77 humans.

78 A recent pan-mammalian study used a literature review to build a database of mammal species' urban  
79 adaptation status (i.e., their ability to live off urban resources (Santini *et al.* 2019)), which they then  
80 linked with species-level phenotypic traits. Although different traits were important for different  
81 mammalian orders, species with larger litters were generally more likely to be urban-adapted. This  
82 relationship could explain the common observation that fast-lived host species (i.e., those that favour  
83 reproduction over survival) tend to disproportionately source zoonotic parasites (Keesing *et al.* 2010;  
84 Ostfeld *et al.* 2014; Albery & Becker 2021). Complicating matters, a given species' observed parasite  
85 diversity depends inherently on the effort that has been directed towards examining it (Olival *et al.*  
86 2017; Gutiérrez *et al.* 2019; Teitelbaum *et al.* 2019; Mollentze & Streicker 2020). Such research effort  
87 is heterogeneously distributed in space (Allen *et al.* 2017; Olival *et al.* 2017; Jorge & Poulin 2018)

88 and across mammal species, particularly with regards to life history (Albery & Becker 2021) and  
89 taxonomy (Olival *et al.* 2017; Mollentze & Streicker 2020). As such, sampling bias could be  
90 important in mediating observed trends among urbanisation, life history, and zoonotic parasite  
91 diversity. In particular, urban mammal species may have more zoonoses as a proportion of their  
92 known parasite richness, because historic contact with humans has allowed more parasites to spill  
93 over into humans and be observed. Although it has been shown that human-adjacent animals have  
94 both more parasite species and more zoonoses (Gibb *et al.* 2020), it is unclear yet whether human  
95 contact has filtered them to produce disproportionately more observed zoonoses in urban species.

96 Here, we take a macroecological approach to investigate (i) whether urban-affiliated mammal species  
97 have more zoonotic parasites and (ii) whether they harbour more zoonotic parasites than expected  
98 given their overall parasite diversity. We anticipated that species capable of adapting to urban settings  
99 would host a higher diversity of known parasites, owing to greater susceptibility and more intense  
100 sampling effort, and that a disproportionately high number of these parasites would be known to be  
101 zoonotic as a result of their greater historical contact with humans. We further expected that urban  
102 adaptation status would account for some variation in the effects of life history traits on parasite  
103 richness, implying that fast-lived species more often transmit zoonotic parasites because they are  
104 more likely to inhabit urban environments in close proximity to humans (Albery & Becker 2021).

## 105 **Results**

106 We ran a series of generalised linear mixed models (GLMMs) that broadly supported our prediction  
107 that urban-adapted mammals would have greater parasite richness. Our first model set examined  
108 parasite richness as a response variable, revealing that urban mammals have more known parasites  
109 (Figure 1A, SI1), and more zoonoses specifically (Figure 1B, SI2). This urban bias diminished  
110 substantially in magnitude when we added citation counts as an explanatory variable representing  
111 research effort (Figure 1C); in the case of overall parasite richness, adding citation counts rendered  
112 the effect of urban adaptation non-significant ( $P=0.07$ ). Citation number was strongly positively  
113 associated with urban status, overall parasite richness, and overall zoonotic richness (Figure 1C, 2), as  
114 well as being significant for all parasite subgroups (Figure SI4-5). We elaborated on these models by  
115 accounting for spatial patterns in parasite richness and sampling effort using a centroid-based SPDE  
116 effect. These effects improved model fit substantially ( $\Delta\text{DIC}>150$ ), and increased the magnitude and  
117 significance of the urban adaptation effects (Figure 1C;  $P=0.018$  and  $0.006$ ). As such, we conclude  
118 that urban species have slightly higher parasite diversities when sampling effort and geographic  
119 heterogeneity are accounted for.

120 To provide further insight into how histories of sampling may have shaped current patterns of  
121 observed pathogen richness across urban-adapted and non-urban species, we used our dataset to  
122 descriptively visualise historical pathogen discovery rates and publication effort trends (1930-2015),

123 following a recent study of mammalian viral discovery (Gibb et al. 2021). We find that fewer annual  
124 discoveries generally occur in urban species; however, because there are so few urban-adapted species  
125 (157 out of 2792), these species have been, on average, more intensely studied and with a higher  
126 parasite richness since the mid-1960s (Figure SI7). Notably, differences in mean parasite richness  
127 between urban-adapted and non-urban species have continued to widen in the intervening years as the  
128 discrepancy in sampling effort has continued to grow (Figure SI7). This finding suggests that higher  
129 observed parasite richness in urban-adapted species is largely driven by long-term, accumulated  
130 differences in sampling effort.

131 We constructed a path analysis, which showed that urban adaptation was not associated with greater  
132 zoonotic richness when accounting for a direct effect of parasite richness; in fact, the estimated effect  
133 was slightly negative (Figure 3;  $P=0.024$ ). In contrast, the indirect effect of urban adaptation on  
134 zoonotic diversity acting through parasite diversity was positive, substantial, and significant (effect  
135  $+0.401$ ; 95% credibility interval 0.116-0.749;  $P=0.004$ ; Figure 3). Taken together, these results imply  
136 that positive effects of urban adaptation on zoonotic diversity act largely through greater overall  
137 known parasite diversity, rather than by disproportionately elevating zoonotic parasite richness  
138 specifically. We performed multiple further analyses to examine several dimensions of urban  
139 adaptation and sampling bias that could affect our results. There was no improvement in model fit  
140 when urban status interacted with host order, suggesting that the effect of urban adaptation on parasite  
141 diversity and zoonotic risk did not vary between mammal orders ( $\Delta\text{DIC}<5$  relative to the base model).  
142 We built a generalised additive mixed model (GAMM) to next examine whether citation numbers had  
143 different effects for urban and non-urban species, but found no support for the interaction ( $\Delta\text{DIC}<5$ ).  
144 Similarly, multivariate models revealed concordance between estimates for the effect of urban  
145 adaptation across parasite subtypes and implied that the urban effects were not being driven by  
146 specific groups of parasites. Finally, we used zero-inflated GLMMs to account for mammal species  
147 with no recorded parasites, demonstrating strong urban biases for the count component (i.e., the  
148 number of parasites a mammal species hosted) as well as the inflation component (i.e., whether the  
149 mammal species had greater than zero known parasites; Figure SI6). This finding implies that our  
150 results are not being disproportionately driven by excess zeroes produced by the inclusion of  
151 pseudoabsences (i.e., species without any evidence of parasites).

152 A GLMM with different spatial fields for urban and non-urban species was not an improvement over  
153 the overall SPDE model ( $\Delta\text{DIC}=14.35$  relative to the SPDE model). This implies that the bias towards  
154 greater parasite richness in urban species is relatively evenly distributed across the globe, rather than  
155 being focussed in certain areas. These findings imply that our results were robust to geographic  
156 variation in parasite richness, and revealed strong spatial patterns (Figure 4C). We also found a  
157 substantial positive estimate for the fixed effect of absolute latitude, revealing greater known parasite  
158 diversities in temperate regions (Figure 4B). We also observed substantial between-continent

159 variation in parasite diversity (Figure 4B): North America was associated with the greatest parasite  
160 diversity, followed by Africa, then Eurasia, South America, and Oceania.

161 Lastly, we also uncovered support for a range of other important species traits driving parasite  
162 richness (Figure 4A). Most notably, faster life history was associated with greater (zoonotic) parasite  
163 diversity, according to PC1 (Figure 4A). However, in the path analysis model, the effect of life history  
164 on zoonotic richness was supplanted by the inclusion of overall parasite richness (Figure SI3). This  
165 finding reveals that, as with urban adaptation status, life history is associated with greater overall  
166 parasite richness rather than zoonotic richness specifically. There was substantial between-order  
167 variation in zoonotic and overall diversity (Figure SI4-5), but adding a continuous phylogenetic  
168 similarity effect did not improve on the order-level effects ( $\Delta\text{DIC}<5$ ). Diet diversity was positively  
169 associated with zoonotic richness, but not overall parasite richness (Figure 4A). Phylogenetic distance  
170 from humans was negatively associated with zoonotic richness overall (Figure 4A), with zoonotic  
171 richness of viruses and helminths, and with overall richness of viruses and helminths; however,  
172 phylogenetic distance from humans was positively associated with overall richness of arthropods  
173 (Figure SI4-5). Greater range area was associated with increased (zoonotic) parasite richness overall  
174 (Figure 4A) and for many parasite subsets (Figure SI4-5). Finally, domesticated species had more  
175 zoonotic helminths and protozoa (Figure SI5) but did not differ in overall parasite richness from non-  
176 domesticated mammal species (Figure 4A, SI4).

## 177 **Discussion**

178 Using a global pan-mammalian dataset of host species' traits and parasite associations, we found that  
179 urban-adapted mammal species have more known parasites, and in turn more zoonotic parasites,  
180 arising largely from research effort. This finding builds on recent work showing that wild animals  
181 with at least one known zoonotic parasite tend to inhabit human-managed landscapes (Gibb *et al.*  
182 2020), but we used a much broader dataset of urban-adapted mammals and applied a strict definition  
183 of urban adaptation based on long-term resource use and fitness in urban landscapes (Santini *et al.*  
184 2019), while accounting for a correlated suite of phenotypic traits, research effort, and geographic  
185 biases, including range size and phylogenetic relatedness to humans. Additionally, we were surprised  
186 to find that urban mammals' zoonotic richness was in fact lower than expected given their observed  
187 parasite richness. Our findings therefore do not support our main prediction that urban-adapted  
188 species host more known zoonotic parasites because they have had more historical contact with  
189 humans, creating more opportunities for the spillover of potentially-zoonotic parasites (Albery &  
190 Becker 2021). Rather, urban species appear to have been preferentially sampled for non-zoonotic  
191 parasites, likely as a result of their proximity to humans and ease of sampling – that is, mammals in  
192 urban contexts might be more often spontaneously examined for parasites, while mammals in non-  
193 urban contexts are more likely to be examined specifically when they are suspected sources of

194 zoonotic parasites. The reason for urban mammals' greater overall parasite richness remains  
195 uncertain, and many questions still linger about the drivers of zoonotic diversity in urban wildlife.  
196 Most pressing, why has human-wildlife contact not driven greater zoonotic diversity in urban  
197 species?

198 Sampling bias is one of few universal phenomena in ecological research (Estes *et al.* 2018; Hughes *et*  
199 *al.* 2020), and understanding these biases is integral to designing interventions and predicting the  
200 consequences of global change. Our models revealed that urban-adapted species have been more  
201 thoroughly sampled for parasites than non-urban species, but in roughly similar patterns. Known  
202 urban status is highly geographically heterogeneous (Santini *et al.* 2019) and in a similar pattern to  
203 disease surveillance (Allen *et al.* 2017; Olival *et al.* 2017; Jorge & Poulin 2018), which we expected  
204 to be driving our perceived urban adaptation effect. The spatial patterns of parasite richness that we  
205 discovered mirror previously reported biases towards temperate, high-income countries (Titley *et al.*  
206 2017; Hughes *et al.* 2020), and were particularly high in North America, while being particularly low  
207 in South America, confirming that parasite biodiversity is substantially undersampled in the tropics  
208 (Jorge & Poulin 2018). This reflects the pattern of urban mammal diversity, which peaks at high  
209 latitudes and is low in South America, Southeast Asia, and sub-Saharan Africa (Santini *et al.* 2019).  
210 However, accounting for this heterogeneity in fact increased the urban bias estimate rather than  
211 decreasing it. Further, there was no significant interaction of urban adaptation with either the spatial  
212 effect or host order, implying minimal geographic and taxonomic bias in these urban-directed  
213 sampling processes. Finally, our temporal analysis revealed that urban and non-urban mammals have  
214 been subjected to similar trends in parasite discovery rate over the last century, with citation counts  
215 and parasite diversity following similar shapes throughout. The only analysis that implied a  
216 qualitatively different sampling trend in urban-adapted mammal species was our path analysis, which  
217 revealed that urban-adapted species have fewer known zoonotic parasites than expected given their  
218 observed parasite richness. Taken together, the evidence suggests that urban species are much better-  
219 sampled for parasites than non-urban species, but with a stronger focus on non-zoonotic parasites, and  
220 this urban bias should be considered in future species-level analyses of zoonotic risk.

221 Even accounting for these layers of bias, our data still retained a positive effect of urban status,  
222 suggesting that either 1) urban mammals are subject to a specific sampling bias that could not be  
223 detected through our analyses, or 2) urban environments increase overall parasite diversity through  
224 effects on host immunity, behaviour, and demography. Although these effects did not  
225 disproportionately increase zoonotic parasite diversity, urban mammals nevertheless host many  
226 zoonotic parasites as a result of their greater overall parasite richness, and therefore understanding this  
227 trend may be important for public health. Anthropogenic pollutants, altered nutrition, and greater host  
228 densities in urban environments have been shown to weaken host immune systems and promote  
229 greater burdens and diversities of parasites when comparing hosts along urban-rural gradients (Becker

230 *et al.* 2018; Murray *et al.* 2019). Such intraspecific effects should accordingly scale up such that  
231 urban-adapted species have greater parasite richness than species that do not experience such immune  
232 impairments. Similarly, greater host densities and resource concentrations could facilitate elevated  
233 rates of density-dependent parasite transmission within and between species, rendering urban-  
234 affiliated species more likely to maintain parasites and resulting in greater observed parasite diversity  
235 (Lloyd-Smith *et al.* 2005). However, there is some evidence that urban wildlife might exhibit stronger  
236 immunological resistance (Hwang *et al.* 2018; Strandin *et al.* 2018; Cummings *et al.* 2020), which  
237 would be expected to have the opposite effect on parasite diversity, and a previous study found that  
238 some parasite groups are decreased in urban environments rather than increased (Werner & Nunn  
239 2020). Unfortunately, the field is generally lacking in large-scale cross-species analyses of immune  
240 function that would be required to differentiate these possibilities (Albery & Becker 2021; but see  
241 Downs *et al.* 2020a, b). Ideally, future analyses incorporating life history, habitat preference,  
242 immunity, and parasite diversity may be better able to differentiate the mechanisms underlying these  
243 species' zoonotic risk (Albery & Becker 2021).

244 Achieving broad insights into the urban drivers of zoonotic risk may require finer-scale data than we  
245 had access to here. This study was conducted with a minimum compatibility filter: we considered a  
246 species as a host of a given parasite if it was observed with said parasite at any point in the literature,  
247 and richness was calculated as the sum of these associations across parasite subgroups. While studies  
248 of parasite diversity are common in macroecology, this deliberately narrow scope limits inference  
249 about a range of relevant processes including host competence (i.e., species' ability to transmit  
250 parasites; Becker *et al.* 2020b), prevalence of the parasite in the host populations, host density, and,  
251 therefore, the *rate* of spillover (i.e., the number of animal-to-human transmission events per unit of  
252 time). These are all important components of a species' zoonotic risk, and some hosts undoubtedly  
253 present substantial zoonotic risk despite having relatively low known parasite diversity. For example,  
254 prairie dogs (*Cynomys ludovicianus*) only have five known parasites in our dataset, yet they are a  
255 widespread and abundant species and may play an important role in epizootic outbreaks of plague  
256 (*Yersinia pestis*) in North America (Hanson *et al.* 2007). Given this disparity, it remains unclear how  
257 closely a species' zoonotic diversity should correlate with the rate of spillover from these species; as  
258 such, we caution that our analysis does not necessarily offer insights into the relative frequency or rate  
259 of spillover events, or the potential severity of zoonotic outbreaks, in urban environments.

260 Providing a general answer to the question “does urbanisation increase the risk of zoonotic disease”  
261 may require datasets of individual- or population-level infection status, using multiple hosts and  
262 parasites, distributed across a wide range of urbanisation gradients. Higher-resolution datasets such as  
263 these would facilitate untangling of within- and between-species confounders, as well as accounting  
264 for spatiotemporal covariates like urban habitat composition (Gecchele *et al.* 2020). These data are  
265 increasingly publicly available and are being used in large-scale analyses of disease dynamics (e.g.



266 (Cohen *et al.* 2020; Albery *et al.* 2021)); as such, these analyses may become increasingly possible in  
267 coming years. Regardless, in these and other analyses, correlated changes in the magnitude and shape  
268 of sampling biases (e.g. towards zoonotic versus non-zoonotic parasites) should be taken into account  
269 when examining links among anthropogenic change, wildlife disease, and zoonotic risk.

## 270 **Methods**

### 271 **Data sources**

272 **Phylogeographic data.** We used the PanTHERIA dataset (Jones *et al.* 2009) as a backbone for  
273 mammal taxonomy and phenotypic traits such as body mass. Phylogenetic data were derived from a  
274 mammalian supertree (Fritz *et al.* 2009), as used for several host-virus ecology studies (e.g. Olival *et al.*  
275 *et al.* 2017; Albery *et al.* 2020; Becker *et al.* 2020). The tree's phylogenetic distances between species  
276 were scaled between 0 and 1. Geographic data were taken from the IUCN species ranges (IUCN  
277 2019). For each species, we calculated total range area by adding together the areas for the 25 km  
278 raster cells in which they were present.

279 To derive a measure of study effort, which often explains substantial variation in parasite diversity  
280 (Olival *et al.* 2017; Mollentze & Streicker 2020), we conducted systematic PubMed searches to  
281 identify how many publications mentioned a given mammal species, following previous methodology  
282 (Becker *et al.* 2020b). Domestication status used a *sensu lato* definition based on whether a species  
283 has ever been partially domesticated, coded as a binary variable. For example, despite being  
284 widespread in the wild, the European red deer (*Cervus elaphus*) is coded as “Domestic” because it is  
285 often farmed, notably in New Zealand (Mason 1994). Because we were investigating spatial  
286 distributions of species (see above), fully domesticated species that do not exist in the wild (e.g. cattle,  
287 *Bos taurus*) were generally excluded due to their absence from the IUCN species ranges. To  
288 investigate whether dietary flexibility could affect parasite diversity, following previous methodology  
289 (Santini *et al.* 2019), we derived diet diversity by calculating a Shannon index from the EltonTraits  
290 database proportional diet contents (Wilman *et al.* 2014).

291 **Life history data.** To investigate how host life history variation affects parasite richness, we used a  
292 previously published, mass-corrected principal components analysis (PCA) of life history variation  
293 across mammal species (Plourde *et al.* 2017). The first two principal components (PCs) from this  
294 analysis, which explained 86% of variation in six life history traits (Plourde *et al.* 2017), were used as  
295 explanatory variables in our models. The six life history traits were gestation length, litter size,  
296 neonate body mass, interbirth interval, weaning age, and sexual maturity age. PC1 explains 63% of  
297 the variance in the six traits, representing a generalisable slow-fast life history axis. PC2 explains 23%  
298 of variance in these traits and represents greater investment in gestation time and larger offspring.  
299 Both PCs were available for all mammals in our dataset. We coded the PCs such that increasing  
300 values corresponded to “faster” life history (i.e., favouring greater reproduction over survival).

301 **Urban adaptation data.** We identified each species' habitat preferences using a published database  
302 of long-term urban adaptation status in mammals (Santini *et al.* 2019). This dataset was compiled  
303 using literature searches to identify species that were observed inhabiting urban environments; species  
304 are either coded as a "visitor" or a "dweller", based on whether they rely fully on urban environments  
305 to survive and reproduce (dweller) or whether they continue to rely on non-urban resources (visitor).  
306 This approach distinguishes our analysis from previous studies (e.g. Gibb *et al.*, 2020): we use a strict  
307 definition of "urban-adapted" species, defining them as "mammals that survive, reproduce, and thrive  
308 in urban environments," rather than basing urban status purely on survey records collected in urban  
309 settings. All species that were in PanTHERIA but were not in the urban adaptation dataset were coded  
310 as "non-urban". We used urban adaptation as a binary variable, coding species as 0 or 1 depending on  
311 whether it was in the urban adaptation dataset. Overall, 180 species in our dataset were coded as a 1,  
312 denoting that they had been observed living off urban resources.

313 **Host-parasite association data.** The recently released CLOVER dataset (Gibb *et al.* 2021) is the  
314 most comprehensive open-source dataset on the mammal-virus network. Here, we use an expanded  
315 version of this dataset that encompasses all parasites, rather than restricting to viruses, making our  
316 analysis the first analytical study to use these taxonomically broad parasite data. This dataset was  
317 synthesized from four large-scale datasets of host-parasite associations, each collected through a  
318 combination of web scrapes and systematic literature searches (Wardeh *et al.* 2015; Olival *et al.* 2017;  
319 Stephens *et al.* 2017; Shaw *et al.* 2020). These include the Enhanced Infectious Diseases Database  
320 (EID2; Wardeh *et al.* 2015); the Host-Pathogen Phylogeny Project (HP3; Olival *et al.* 2017); the  
321 Global Mammal Parasite Database (GMPD; Stephens *et al.* 2017); and a large-scale database on  
322 viruses and bacteria and their known hosts (Shaw *et al.* 2020). These contain a range of parasite  
323 groups, including viruses, bacteria, protozoa, fungi, helminths, and arthropods. In this conjoined  
324 dataset, host-parasite associations were counted according to demonstrated compatibility: that is, if a  
325 host species had ever been discovered infected with a given parasite, it was coded as a 1, and all  
326 undemonstrated associations were assumed absent. In addition to the taxonomic reconciliation  
327 underlying the CLOVER dataset, we cleaned the parasite names with the R package *taxize*  
328 (Chamberlain & Szöcs 2013), removing parasites that were not identified to species level and  
329 ensuring that no parasites existed under multiple identities. This ensured that no host-parasite  
330 associations were counted twice, resulting in a total 18,967 unique host-parasite associations.

331 From this conjoined dataset, we derived the following traits for each mammal host species in our  
332 dataset: 1) **Total parasite richness:** the number of unique parasite species known to infect a given  
333 host species; 2) **Zoonotic parasite richness:** the number of these parasites that has also been  
334 observed to infect humans in our dataset. All analyses were repeated for overall parasite numbers  
335 (e.g., total number of zoonoses across all parasite groups) and for specific parasite subgroups (viruses,  
336 bacteria, protozoa, fungi, helminths, and arthropods).

337 For each analysis, to facilitate model fitting, we eliminated species for which there were missing data  
338 and then removed all host orders for which there were fewer than 20 species or for which fewer than  
339 1% of species had one or more known parasites. Leaving these taxa in did not notably alter fixed  
340 effects estimates generally but generated unlikely estimates for order-level effects). When combining  
341 the phenotypic, urban adaptation, and parasite datasets, any species with no known parasite  
342 associations was coded as a zero (i.e., a pseudoabsence), under the assumption that species with no  
343 known parasites are still informative of variables associated with low parasite richness (Albery &  
344 Becker 2021).

## 345 Models

346 **Base model.** To analyse associations between urban adaptation status and parasite richness, we used  
347 Generalised Linear Mixed Models (GLMMs) inferred using Integrated Nested Laplace  
348 Approximation (INLA) (Lindgren *et al.* 2011; Lindgren & Rue 2015). We used two response  
349 variables with a negative binomial distribution: total parasite richness and zoonotic parasite richness,  
350 where the second value was a subset of the first. Explanatory variables included: Citation number  
351 ( $\log(x+1)$ -transformed); Host order (7 levels: Artiodactyla, Carnivora, Chiroptera, Lagomorpha,  
352 Primates, Rodentia, Soricomorpha); Urban adaptation status (binary; non-urban/urban); range area  
353 (continuous, log-transformed, defined above); Phylogenetic distance from humans (continuous, scaled  
354 0-1); Body mass (continuous, log-transformed); Domestication status (binary); and two life history  
355 principal components (PC1 and PC2; continuous, taken from Plourde *et al.* 2017). We also applied  
356 these models to each parasite subset to assess the generality of our parameter estimates. To examine  
357 how much of the observed urban effects were attributable to research effort, we

358 **Urban:citation GAMs.** Because urban status and citation number were highly correlated and showed  
359 very different distributions, we fitted a generalised additive model (GAM) that was otherwise  
360 identical to our GLMMs, but with a smoothed term for citations that included an interaction with  
361 urban status.

362 **Urban-order interaction model.** We then compared the base model with one including an  
363 interaction between host order and urban adaptation status to investigate whether the effect of urban  
364 adaptation varied taxonomically. We used the Deviance Information Criterion (DIC) to measure  
365 model fit, with a threshold change ( $\Delta$ DIC) under 5 denoting competitive models.

366 **Phylogenetic model.** For each model, we fitted a phylogenetic similarity effect in place of the host  
367 order effect to estimate how phylogenetic relatedness between species contributed to similarity in  
368 parasite richness. We used DIC to identify whether this effect improved model fit in the same way as  
369 the interaction model.

370 **Multivariate models.** To investigate whether urban adaptation status had different effects for the  
371 richness of different parasite types, we fitted two multi-response models using the *MCMCglmm*  
372 package (Hadfield 2010): one for overall richness and one for zoonotic richness. These models used  
373 each of the six parasite groups as response variables and included the same fixed effects, with  
374 different (but correlated) slopes for each response. Comparing the model's estimates for the effect of  
375 urban adaptation for each parasite allowed us to ask whether specific parasite groups are significantly  
376 more likely to be associated with urban adaptation status than others.

377 **Zero-inflated models.** To investigate whether pseudoabsences were disproportionately altering our  
378 results, we ran zero-inflated models of parasite and zoonotic richness again using *MCMCglmm* to  
379 control for processes that specifically generate zero-counts. These models generate two estimates for  
380 each explanatory variable: 1) the effect on the probability that a species' parasite count is greater than  
381 zero ("zero-inflation") and 2) the effect on parasite count greater than zero when accounting for this  
382 effect ("Poisson"). Importantly, the Poisson component of this model generates some zeroes itself,  
383 which improves upon similar models (e.g. hurdle models) in which all zeroes must be produced by the  
384 inflation term. This model allows us to identify whether, for example, urban species are simply more  
385 likely to have one or more known parasites, rather than having a greater overall known parasite  
386 richness, and whether our choice to code mammals with no known parasites as zero-counts would  
387 influence the results.

388 **Historical rates of parasite discovery.** To investigate how differences between urban and non-urban  
389 wild mammals have accumulated over time, we analysed historical rates of parasite discovery and  
390 citation effort (from PubMed) between 1930 and 2020, following the methodology described in Gibb  
391 et al. 2021. Briefly, each unique host-parasite association was assigned a "discovery date" (the year of  
392 the earliest reported association in our dataset, based on either publication year, accession year or  
393 sampling year depending on the original data source; see Gibb *et al.* (2021) for details). We accessed  
394 yearly counts of citations from the PubMed database per host species using the `rentrez` package  
395 (Winter 2017). We visualised annual trends in novel parasite discovery and novel host-parasite  
396 association discovery in both urban and non-urban mammal species. We then fitted generalised  
397 additive models with a nonlinear effect of year (specified as a penalised thin-plate regression spline)  
398 to estimate the annual species-level mean publications, cumulative publications, parasites discovered  
399 and cumulative parasite richness, fitting separate models for urban-adapted (n=146) and non-urban  
400 (n=1365) species in our host-parasite dataset. We visualised fitted trends in these metrics to examine  
401 how differences in yearly and cumulative publication effort and parasite discovery rates have varied  
402 between urban and non-urban species (Figure SI7).

403 **Path analysis.** To investigate whether urban mammals had a disproportionately high zoonotic  
404 richness when accounting for overall parasite richness, we fitted a path analysis (Shipley 2009) with

405 zoonotic richness as the ultimate response variable,  $\log(\text{overall richness} + 1)$  as an explanatory  
406 variable, and every other explanatory variable described above. We took 1000 random draws from the  
407 posterior distributions of 1) the effect of urban affiliate status on overall parasite diversity; 2) the  
408 effect of urban affiliate status on zoonotic richness; and 3) the effect of overall richness on zoonotic  
409 richness. This approach allowed us to identify whether urban adaptation had a significant positive  
410 effect on zoonotic richness when accounting for its effect on parasite richness as a whole, informing  
411 us as to whether a disproportionate number of urban mammals' known parasites are known zoonoses.

412 **Spatial model.** Observed parasite diversity in mammals is highly spatially heterogeneous at a global  
413 level (Allen *et al.* 2017; Olival *et al.* 2017; Carlson *et al.* 2020b), while the diversity of known urban-  
414 adapted species is heavily biased towards North America and Eurasia (Santini *et al.* 2019). Both are  
415 driven by a combination of geographic variation in sampling effort as well as biotic and abiotic  
416 factors. To control for these spatial heterogeneities, we fitted spatial explanatory variables using three  
417 approaches. First, we 1) used a stochastic partial differential equation (SPDE) effect in INLA  
418 (Lindgren *et al.* 2011; Lindgren & Rue 2015). This effect used species' geographic centroids in their  
419 IUCN ranges to control for spatial autocorrelation in the response variable according to Matern  
420 correlation, where species that were closer in space would be predicted to have similar numbers of  
421 known parasites as a result of sampling bias and biological factors. We first fitted one spatial field to  
422 the whole dataset to look for overall spatial structuring, and we then allowed this spatial effect to vary  
423 for urban and non-urban species to investigate whether the distribution of known richness varies  
424 between these hosts. We also 2) incorporated species' presence on each of five continents (Eurasia,  
425 Africa, North America, South America, and Oceania) as binary variables and 3) added absolute  
426 latitude (i.e. distance from the equator). For the latter two approaches, we also fitted an interaction  
427 with urban adaptation to investigate whether the effect of urban adaptation status varied across space.

428

429

430 **Figure 1:** Urban-adapted mammals have more known parasites (A, C) and zoonoses specifically (B,  
431 D). In A-B, each point represents a mammal species, stratified by species that can capitalize on urban  
432 environments and those that do not. The Y axis represents the species' known parasite diversity, on a  
433 log<sub>10</sub> scale. Black dots and error bars represent raw group means and standard errors, respectively.  
434 Panels C-D present the urban adaptation effect for overall richness (C) and zoonotic richness (D),  
435 across multiple model formulations. The “base” models include all fixed effects but citation number;  
436 the following model includes citation number; and the third includes both citation number and a  
437 spatially distributed SPDE random effect. Points represent the mean of the posterior effect estimate  
438 distribution from the GLMMs; error bars represent the 95% credibility intervals. Numbers above the  
439 error bars display the P values, with asterisks denoting levels of significance (\*<0.05; \*\*<0.01;  
440 \*\*\*<0.001).

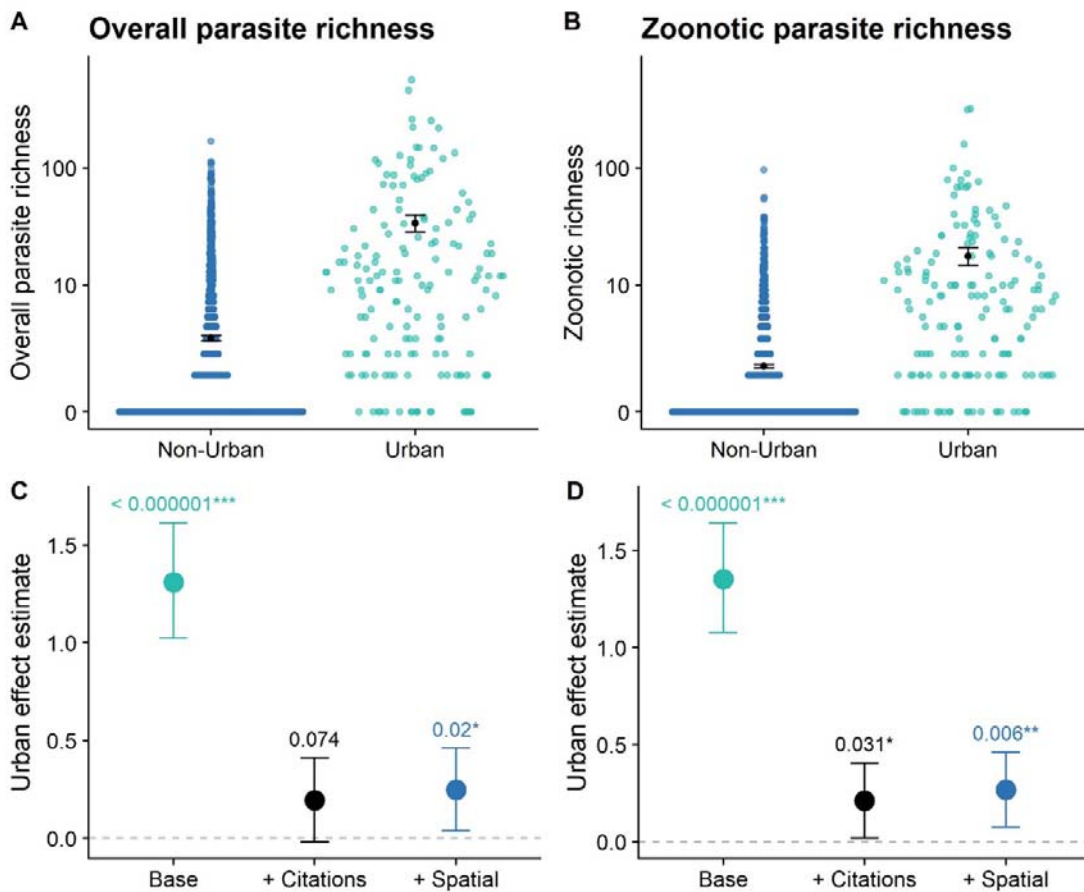

441

442

443 Figure 2: Citation numbers are higher in urban species (A), and drive observed parasite richness (B)  
444 and observed zoonotic parasite richness (C). Each point represents a species. R and P values are  
445 derived according to Spearman's rank correlations. In panel A, black dots and error bars represent raw  
446 group means and standard errors, respectively. See Figure 1 for the slope estimates from the GLMMs  
447 for panels B-C.

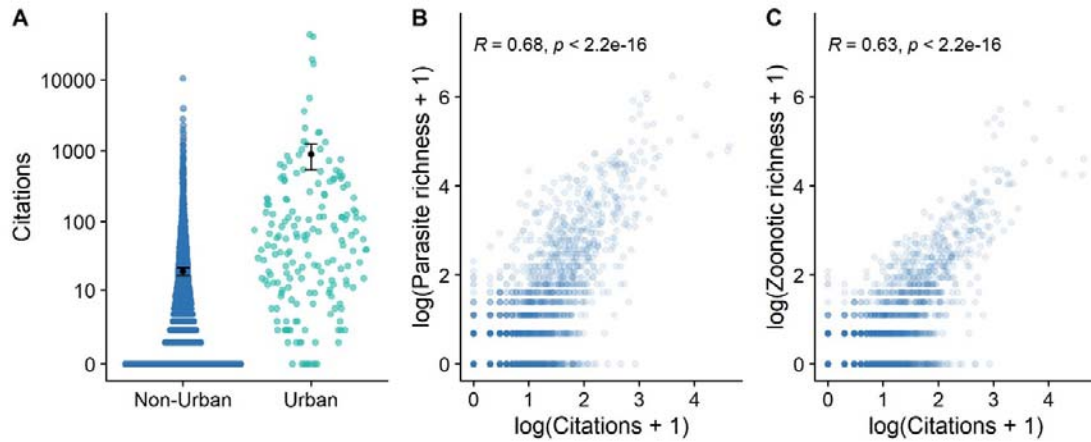

448

449

450

451 **Figure 3:** Path analysis revealed that urban-adapted mammals do not have more zoonoses than  
452 expected given their overall parasite diversity. Arrows denote hypothesised causal relationships. Red  
453 lines represent positive effects and blue lines represent negative effects. Other variables were included  
454 in the component linear models, but are not displayed in this figure for clarity. Labels display the  
455 model effect estimates on the log link scale, with 95% credibility intervals in brackets, and P values  
456 based on proportional overlap with 0.

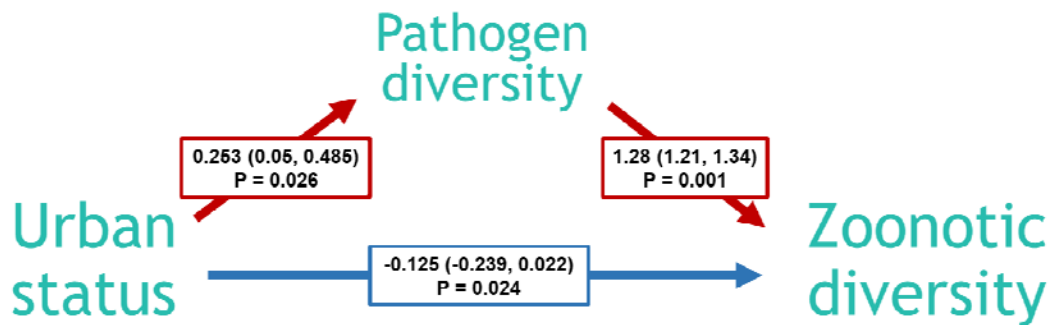

457

458

459

460

461



462 **Figure 4:** Model fixed effect estimates and spatial effects. (A) Fixed effects from the GLMMs for  
463 overall parasite richness and zoonotic richness, excluding order-level effects. These models included  
464 an SPDE random effect to control for spatial autocorrelation. (B) Fixed effect estimates from the non-  
465 spatial GLMMs for overall parasite richness and zoonotic richness. In A-B, points represent the mean  
466 of the posterior effect estimate distribution from the GLMMs; error bars represent the 95% credibility  
467 intervals. Asterisks denote estimates that were significantly different from zero. Order-level effects  
468 have been left out for clarity; see the Figures SI4-5 for full model effect estimates. (C) Spatial  
469 distribution of the SPDE random effect, identifying hot- and coldspots of parasite richness when non-  
470 spatial fixed effects (all effects except latitude and continent) are taken into account. Darker colours  
471 correspond to greater parasite richness.

472

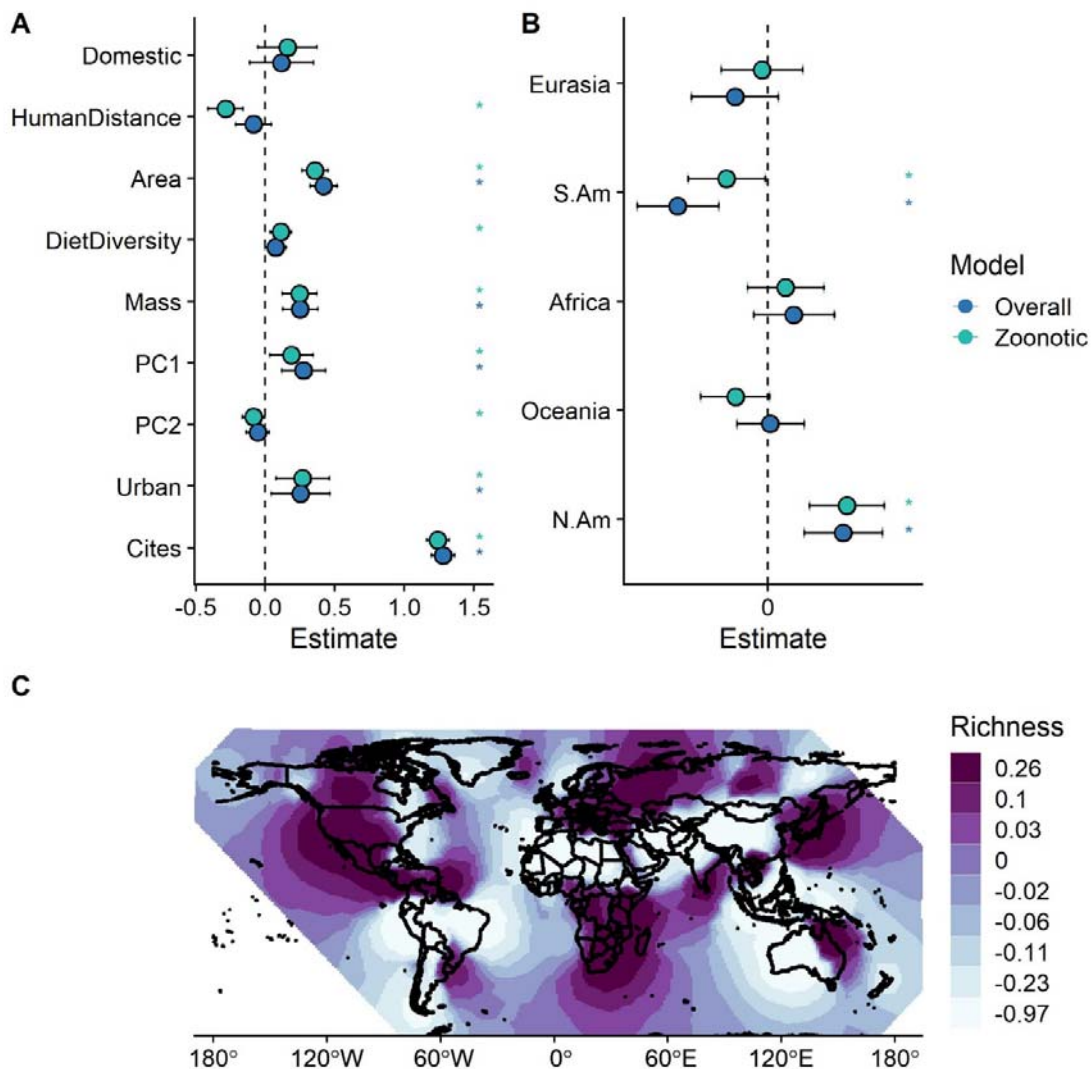

473

474

475

476

## 477 References

- 478 Albery, G.F. & Becker, D.J. (2021). Fast-lived Hosts and Zoonotic Risk. *Trends Parasitol.*, 1–13.
- 479 Albery, G.F., Eskew, E.A., Ross, N. & Olival, K.J. (2020). Predicting the global mammalian viral  
480 sharing network using phylogeography. *Nat. Commun.*, 1–9.
- 481 Albery, G.F., Sweeny, A.R., Becker, D.J. & Bansal, S. (2021). Fine-scale spatial patterns of wildlife  
482 disease are common and understudied. *Funct. Ecol.*
- 483 Allen, T., Murray, K.A., Zambrana-Torrel, C., Morse, S.S., Rondinini, C., Di Marco, M., *et al.*  
484 (2017). Global hotspots and correlates of emerging zoonotic diseases. *Nat. Commun.*, 8, 1124.
- 485 Becker, D.J., Albery, G.F., Kessler, M.K., Lunn, T.J., Falvo, C.A., Cziráj, G.Á., *et al.* (2020a).  
486 Macroimmunology: the drivers and consequences of spatial patterns in wildlife immune defense.  
487 *J. Anim. Ecol.*, 89, 972–995.
- 488 Becker, D.J., Albery, G.F., Sjödin, A.R., Poisot, T. & Dallas, T.A. (2020b). Predicting wildlife hosts  
489 of betacoronaviruses for SARS-CoV-2 sampling prioritization. *bioRxiv*.
- 490 Becker, D.J., Hall, R.J., Forbes, K.M., Plowright, R.K. & Altizer, S. (2018). Anthropogenic resource  
491 subsidies and host–parasite dynamics in wildlife. *Philos. Trans. R. Soc. B Biol. Sci.*, 373,  
492 20170086.
- 493 Becker, D.J., Seifert, S.N. & Carlson, C.J. (2020c). Beyond Infection: Integrating Competence into  
494 Reservoir Host Prediction. *Trends Ecol. Evol.*
- 495 Becker, D.J., Streicker, D.G. & Altizer, S. (2015). Linking anthropogenic resources to wildlife-  
496 pathogen dynamics: a review and meta-analysis. *Ecol. Lett.*, 18, 483–495.
- 497 Carlson, C.J., Albery, G.F., Merow, C., Trisos, C.H., Zipfel, C.M., Eskew, E.A., *et al.* (2020a).  
498 Climate change will drive novel cross-species viral transmission. *bioRxiv*.
- 499 Carlson, C.J., Dallas, T.A., Alexander, L.W., Phelan, A.L. & Phillips, A.J. (2020b). What would it  
500 take to describe the global diversity of parasites? *Proc. R. Soc. B Biol. Sci.*, 287, 20201841.
- 501 Chamberlain, S.A. & Szöcs, E. (2013). taxize: taxonomic search and retrieval in R. *F1000Research*,  
502 2, 191.
- 503 Chen, G., Li, X., Liu, X., Chen, Y., Liang, X., Leng, J., *et al.* (2020). Global projections of future  
504 urban land expansion under shared socioeconomic pathways. *Nat. Commun.*, 11, 1–12.
- 505 Cohen, J.M., Sauer, E.L., Santiago, O., Spencer, S. & Rohr, J.R. (2020). Divergent impacts of  
506 warming weather on wildlife disease risk across climates. *Science (80-. )*, 370, eabb1702.
- 507 Cummings, C.R., Khan, N.Y., Murray, M.M., Ellison, T., Welch, C.N., Hernandez, S.M., *et al.*  
508 (2020). Foraging in Urban Environments Increases Bactericidal Capacity in Plasma and  
509 Decreases Corticosterone Concentrations in White Ibises, 8, 1–11.
- 510 Downs, C.J., Dochtermann, N.A., Ball, R., Klasing, K.C. & Martin, L.B. (2020a). The effects of body  
511 mass on immune cell concentrations of mammals. *Am. Nat.*, 195.
- 512 Downs, C.J., Schoenle, L.A., Oakey, S.J., Ball, R., Jiang, R.H.Y., Klasing, K.C., *et al.* (2020b).  
513 Extreme hyperallometry of mammalian antibacterial defenses. *bioRxiv*, 2020.09.04.242107.
- 514 Estes, L., Elsen, P.R., Treuer, T., Ahmed, L., Caylor, K., Chang, J., *et al.* (2018). The spatial and  
515 temporal domains of modern ecology. *Nat. Ecol. Evol.*, 2, 819–826.
- 516 Fritz, S.A., Bininda-Emonds, O.R.P. & Purvis, A. (2009). Geographical variation in predictors of  
517 mammalian extinction risk: big is bad, but only in the tropics. *Ecol. Lett.*, 12, 538–549.
- 518 Gao, J. & O’Neill, B.C. (2020). Mapping global urban land for the 21st century with data-driven  
519 simulations and Shared Socioeconomic Pathways. *Nat. Commun.*, 11, 1–12.
- 520 Gecchele, L. V, Pedersen, A.B. & Bell, M. (2020). Fine-scale variation within urban landscapes

- 521 affects marking patterns and gastrointestinal parasite diversity in red foxes. *Ecol. Evol.*, 10,  
522 13796–13809.
- 523 Gibb, R., Albery, G.F., Becker, D.J., Brierley, L., Connor, R., Dallas, T.A., *et al.* (2021). Data  
524 proliferation, reconciliation, and synthesis in viral ecology. *Bioscience*.
- 525 Gibb, R., Redding, D.W., Chin, K.Q., Donnelly, C.A., Blackburn, T.M., Newbold, T., *et al.* (2020).  
526 Zoonotic host diversity increases in human-dominated ecosystems. *Nature*.
- 527 Gutiérrez, J.S., Piersma, T. & Thieltges, D.W. (2019). Micro- and macroparasite species richness in  
528 birds: The role of host life history and ecology. *J. Anim. Ecol.*, 88, 1226–1239.
- 529 Hadfield, J.D. (2010). MCMC methods for multi-response generalized linear mixed models: the  
530 MCMCglmm R package. *J. Stat. Softw.*, 33, 1–22.
- 531 Hanson, D.A., Britten, H.B., Restani, M. & Washburn, L.R. (2007). High prevalence of *Yersinia*  
532 *pestis* in black-tailed prairie dog colonies during an apparent enzootic phase of sylvatic plague.  
533 *Conserv. Genet.*, 8, 789–795.
- 534 Hassell, J.M., Begon, M., Ward, M.J. & Fèvre, E.M. (2017). Urbanization and Disease Emergence:  
535 Dynamics at the Wildlife–Livestock–Human Interface. *Trends Ecol. Evol.*, 32, 55–67.
- 536 Hughes, A., Orr, M., Ma, K., Costello, M., Waller, J., Provoost, P., *et al.* (2020). Sampling biases  
537 shape our view of the natural world. *Authorea Prepr.*, 1–11.
- 538 Hwang, J., Kim, Y., Lee, S.W., Kim, N.Y., Chun, M.S., Lee, H., *et al.* (2018). Anthropogenic food  
539 provisioning and immune phenotype: Association among supplemental food, body condition,  
540 and immunological parameters in urban environments. *Ecol. Evol.*, 8, 3037–3046.
- 541 IUCN. (2019). *The IUCN Red List of Threatened Species. IUCN Red List Threat. Species. Version*  
542 *2019-2*. Available at: <https://www.iucnredlist.org>. Last accessed .
- 543 Jones, K.E., Habib, M., Bielby, J., Boakes, E.H., Gittleman, J.L., Carbone, C., *et al.* (2009).  
544 PanTHERIA: a species-level database of life history, ecology, and geography of extant and  
545 recently extinct mammals. *Ecology*, 90, 2648–2648.
- 546 Jones, K.E., Patel, N.G., Levy, M. a, Storeygard, A., Balk, D., Gittleman, J.L., *et al.* (2008). Global  
547 trends in emerging infectious diseases. *Nature*, 451, 990–993.
- 548 Jorge, F. & Poulin, R. (2018). Poor geographical match between the distributions of host diversity and  
549 parasite discovery effort. *Proc. R. Soc. B Biol. Sci.*, 285.
- 550 Keesing, F., Belden, L.K., Daszak, P., Dobson, A., Harvell, C.D., Holt, R.D., *et al.* (2010). Impacts of  
551 biodiversity on the emergence and transmission of infectious diseases. *Nature*, 468, 647–652.
- 552 Lindgren, F. & Rue, H. (2015). Bayesian Spatial Modelling with R-INLA. *J. Stat. Softw.*, 63, 1–25.
- 553 Lindgren, F., Rue, H. & Lindstrom, J. (2011). An explicit link between Gaussian fields and Gaussian  
554 Markov random fields: the stochastic partial differential equation approach. *J. R. Stat. Soc. B*,  
555 73, 423–498.
- 556 Lloyd-Smith, J.O., Cross, P.C., Briggs, C.J., Daugherty, M., Getz, W.M., Latto, J., *et al.* (2005).  
557 Should we expect population thresholds for wildlife disease? *Trends Ecol. Evol.*, 20, 511–519.
- 558 Loh, E.H., Zambrana-Torrelío, C., Olival, K.J., Bogich, T.L., Johnson, C.K., Mazet, J.A.K., *et al.*  
559 (2015). Targeting Transmission Pathways for Emerging Zoonotic Disease Surveillance and  
560 Control. *Vector-Borne Zoonotic Dis.*, 15, 432–437.
- 561 Mason, P. (1994). Parasites of deer in New Zealand. *New Zeal. J. Zool.*, 21, 39–47.
- 562 Mollentze, N. & Streicker, D.G. (2020). Viral zoonotic risk is homogenous among taxonomic orders  
563 of mammalian and avian reservoir hosts. *Proc. Natl. Acad. Sci.*, 1–8.
- 564 Morse, S.S., Mazet, J. a K., Woolhouse, M., Parrish, C.R., Carroll, D., Karesh, W.B., *et al.* (2012).  
565 Prediction and prevention of the next pandemic zoonosis. *Lancet*, 380, 1956–1965.

- 566 Murray, M.H., Sánchez, C.A., Becker, D.J., Byers, K.A., Worsley-Tonks, K.E.L. & Craft, M.E.  
567 (2019). City sicker? A meta-analysis of wildlife health and urbanization. *Front. Ecol. Environ.*,  
568 17, 575–583.
- 569 Olival, K.J., Hosseini, P.R., Zambrana-Torrel, C., Ross, N., Bogich, T.L. & Daszak, P. (2017). Host  
570 and viral traits predict zoonotic spillover from mammals. *Nature*, 546, 646–650.
- 571 Ostfeld, R.S., Levi, T., Jolles, A.E., Martin, L.B., Hosseini, P.R. & Keesing, F. (2014). Life History  
572 and demographic drivers of reservoir competence for three tick-borne zoonotic pathogens. *PLoS*  
573 *One*, 9.
- 574 Plourde, B.T., Burgess, T.L., Eskew, E.A., Roth, T.M., Stephenson, N. & Foley, J.E. (2017). Are  
575 disease reservoirs special? Taxonomic and life history characteristics. *PLoS One*, 12, e0180716.
- 576 Santini, L., González-Suárez, M., Russo, D., Gonzalez-Voyer, A., von Hardenberg, A. & Ancillotto,  
577 L. (2019). One strategy does not fit all: determinants of urban adaptation in mammals. *Ecol.*  
578 *Lett.*, 22, 365–376.
- 579 Seto, K.C., Güneralp, B. & Hutyra, L.R. (2012). Global forecasts of urban expansion to 2030 and  
580 direct impacts on biodiversity and carbon pools. *Proc. Natl. Acad. Sci. U. S. A.*, 109, 16083–  
581 16088.
- 582 Shaw, L.P., Wang, A.D., Dylus, D., Meier, M., Pogacnik, G., Dessimoz, C., *et al.* (2020). The  
583 phylogenetic range of bacterial and viral pathogens of vertebrates. *Mol. Ecol.*, 1–19.
- 584 Shipley, B. (2009). Confirmatory path analysis in a generalized multilevel context. *Ecology*, 90, 363–  
585 368.
- 586 Stephens, P.R., Pappalardo, P., Huang, S., Byers, J.E., Farrell, M.J., Gehman, A., *et al.* (2017). Global  
587 Mammal Parasite Database version 2.0. *Ecology*, 98, 1476.
- 588 Strandin, T., Babayan, S.A. & Forbes, K.M. (2018). Reviewing the effects of food provisioning on  
589 wildlife immunity. *Philos. Trans. R. Soc. B Biol. Sci.*, 373.
- 590 Teitelbaum, C.S., Amoroso, C.R., Huang, S., Davies, T.J., Rushmore, J., Drake, J.M., *et al.* (2019). A  
591 comparison of diversity estimators applied to a database of host–parasite associations. *Ecography*  
592 *(Cop.)*, 43, 1316–1328.
- 593 Titley, M.A., Snaddon, J.L. & Turner, E.C. (2017). Scientific research on animal biodiversity is  
594 systematically biased towards vertebrates and temperate regions. *PLoS One*, 12, e0189577.
- 595 Wardeh, M., Risley, C., McIntyre, M.K., Setzkorn, C. & Baylis, M. (2015). Database of host-  
596 pathogen and related species interactions, and their global distribution. *Sci. Data*, 2, 150049.
- 597 Werner, C.S. & Nunn, C.L. (2020). Effect of urban habitat use on parasitism in mammals: a meta-  
598 analysis. *Proceedings. Biol. Sci.*, 287, 20200397.
- 599 Wilman, H., J. B., J. S., C., de L.R., M., R. & W, J. (2014). EltonTraits 1.0: Species-level  
600 foraging attributes of the world's birds and mammals. *Ecology*, 95, 2027.
- 601 Winter, D.J. (2017). rentrez: An R package for the NCBI eUtils API. *R J.*, 9, 520–526.

602

603

604 Supplement: Urban-adapted mammal  
605 species have more known pathogens

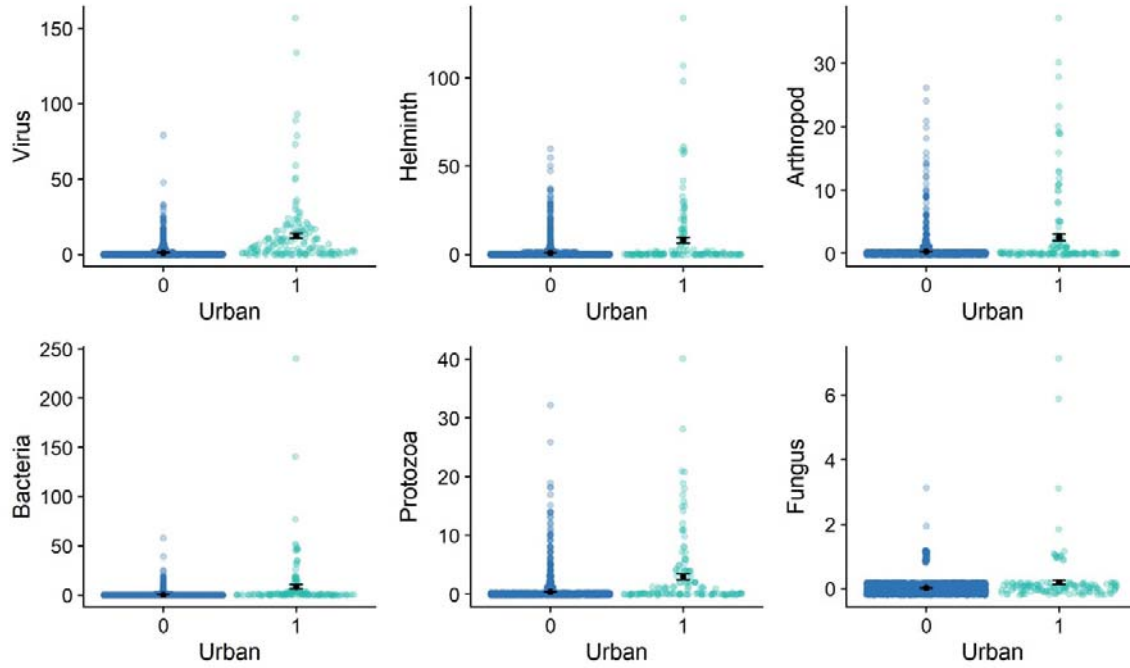

606

607 SIFigure 1: The effect of urban affiliation on diversity of pathogen subsets. Each point  
608 represents a mammal species, stratified by species that can capitalize on urban  
609 environments (1) and those that do not (0). The Y axis represents the species' known  
610 pathogen diversity. Black dots and error bars represent raw group means and standard  
611 errors, respectively. Displayed at the top of each panel are effect sizes for the between-  
612 group difference, 95% credibility intervals (in brackets), and P values, taken from our  
613 GLMMs including other explanatory variables.

614

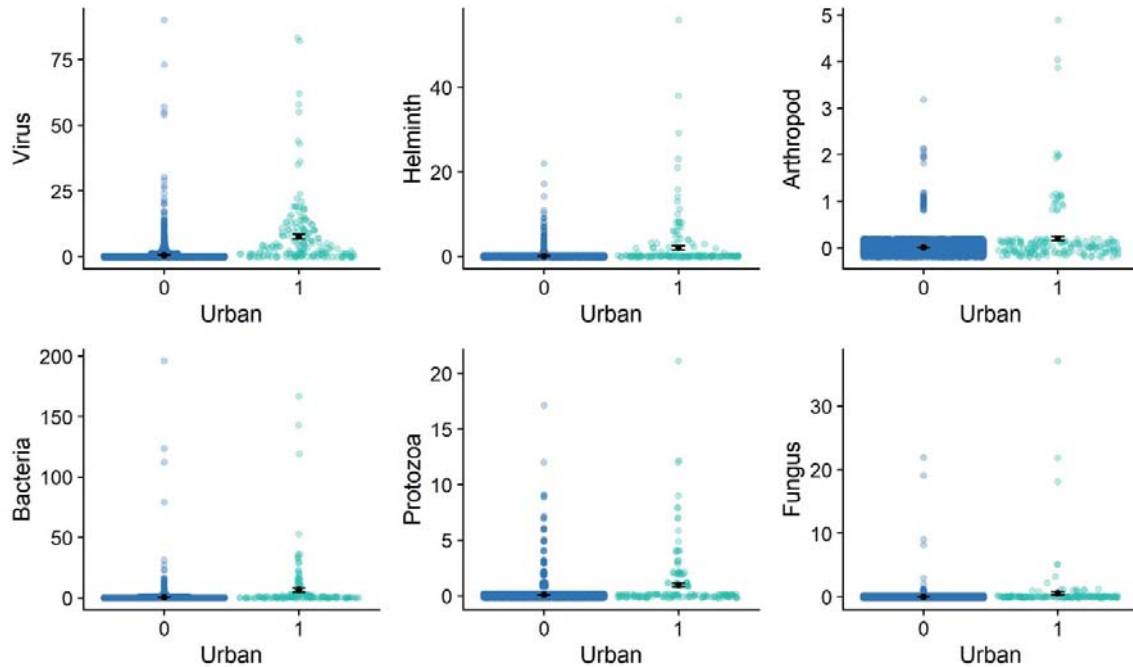

615

616 SIFigure 2: The effect of urban affiliation on zoonotic diversity of pathogen subsets. Each  
617 point represents a mammal species, stratified by species that can capitalize on urban  
618 environments (1) and those that do not (0). The Y axis represents the species' known  
619 pathogen diversity. Black dots and error bars represent raw group means and standard  
620 errors, respectively.

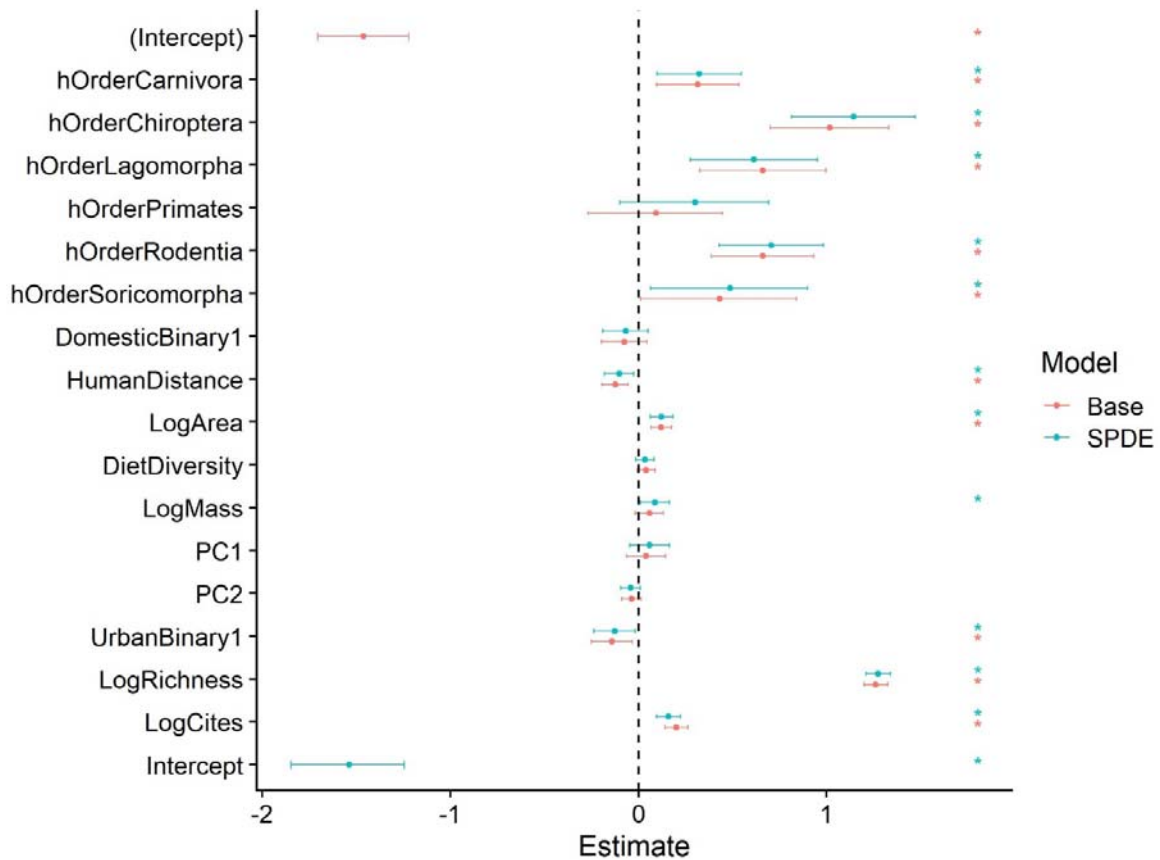

621

622 SIFigure 3: Model effects for all fixed effects retained in the path analysis models for overall  
623 zoonotic diversity, for both base and spatial model formulations. Points represent the mean  
624 of the posterior effect estimate distribution; error bars represent the 95% credibility intervals.  
625 Model effects are displayed on the link scale. Explanatory variables are described in the  
626 methods. hOrder = host order; LogCites = log(citation number + 1); DomesticBinary1 =  
627 domestic species; HumanDistance = phylogenetic distance from humans; LogArea =  
628 log(area of IUCN range) in KM<sup>2</sup>; DietDiversity = diet diversity; LogMass = log(body mass) in  
629 kg; PC1 = first principal component of life history traits PCA; PC2 = second principal  
630 component of life history traits PCA; UrbanBinary1 = Urban adapted species; LogRichness =  
631 log(overall parasite richness + 1).

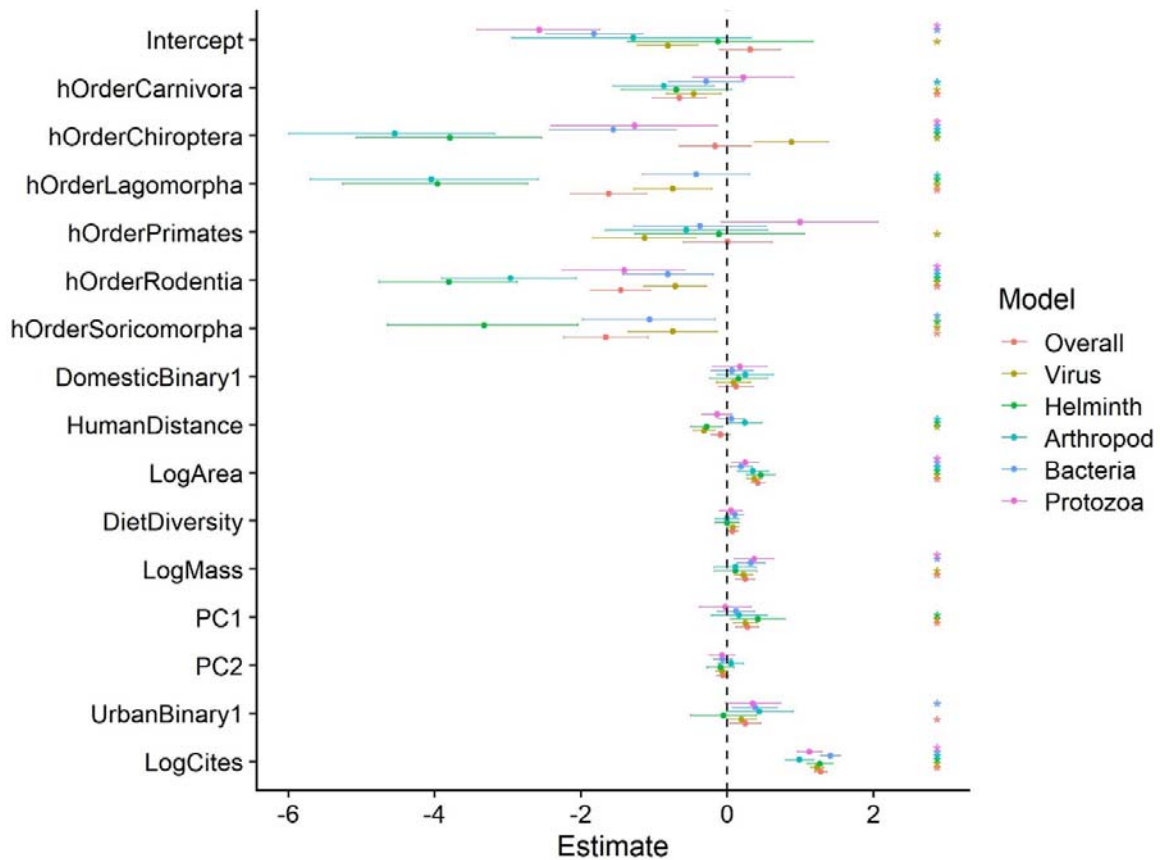

632

633 SIFigure 4: Model effects for all fixed effects in the spatial models of parasite diversity.

634 Points represent the mean of the posterior effect estimate distribution; error bars represent  
635 the 95% credibility intervals. Different colours represent different parasite groups, including  
636 overall parasites and a range of subgroups. Model effects are displayed on the link scale.

637 Explanatory variables are described in the methods. hOrder = host order; LogCites =

638  $\log(\text{citation number} + 1)$ ; DomesticBinary1 = domestic species; HumanDistance =

639 phylogenetic distance from humans; LogArea =  $\log(\text{area of IUCN range})$  in  $\text{KM}^2$ ;

640 DietDiversity = diet diversity; LogMass =  $\log(\text{body mass})$  in kg; PC1 = first principal

641 component of life history traits PCA; PC2 = second principal component of life history traits

642 PCA; UrbanBinary1 = Urban adapted species.



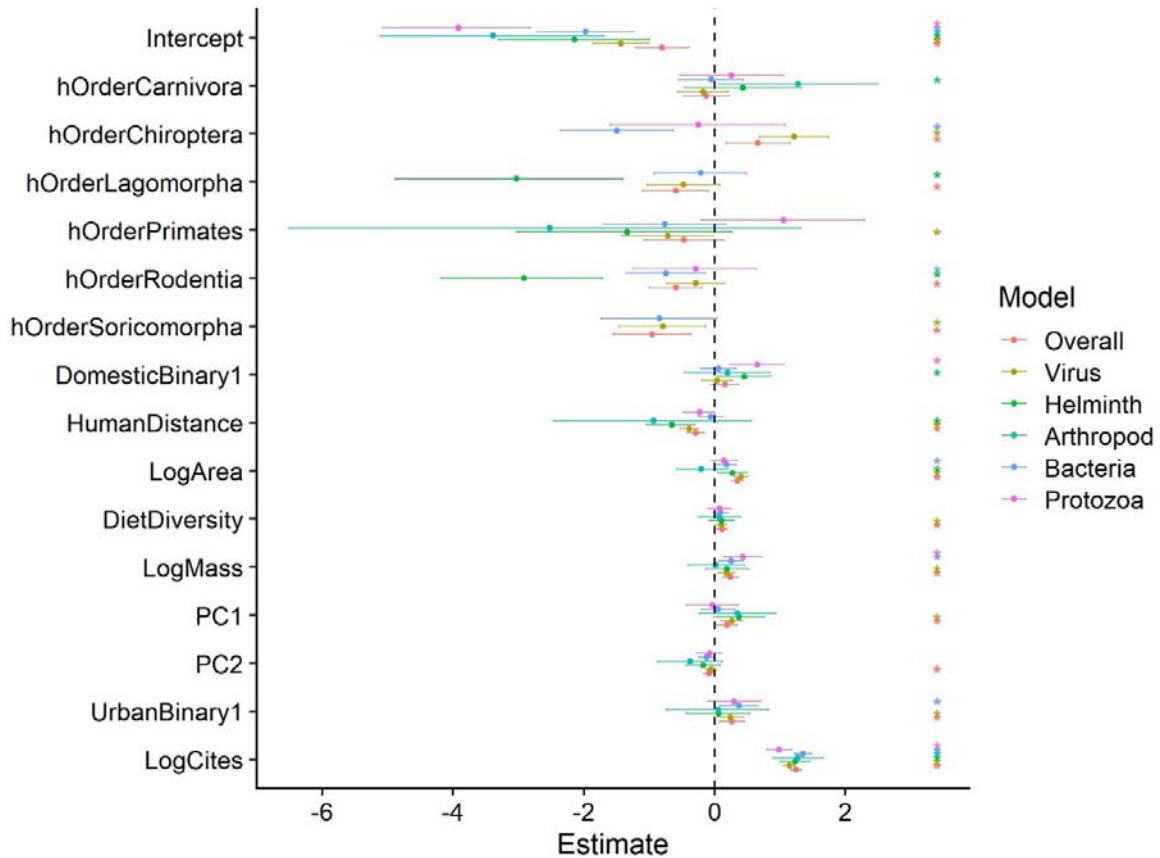

643

644 SIFigure 5: Model effects for all fixed effects in the spatial models of zoonotic parasite  
645 diversity. Points represent the mean of the posterior effect estimate distribution; error bars  
646 represent the 95% credibility intervals. Different colours represent different parasite groups,  
647 including overall parasites and a range of subgroups. Model effects are displayed on the link  
648 scale. Explanatory variables are described in the methods. hOrder = host order; LogCites =  
649 log(citation number + 1); DomesticBinary1 = domestic species; HumanDistance =  
650 phylogenetic distance from humans; LogArea = log(area of IUCN range) in KM<sup>2</sup>;  
651 DietDiversity = diet diversity; LogMass = log(body mass) in kg; PC1 = first principal  
652 component of life history traits PCA; PC2 = second principal component of life history traits  
653 PCA; UrbanBinary1 = Urban adapted species.

654

655

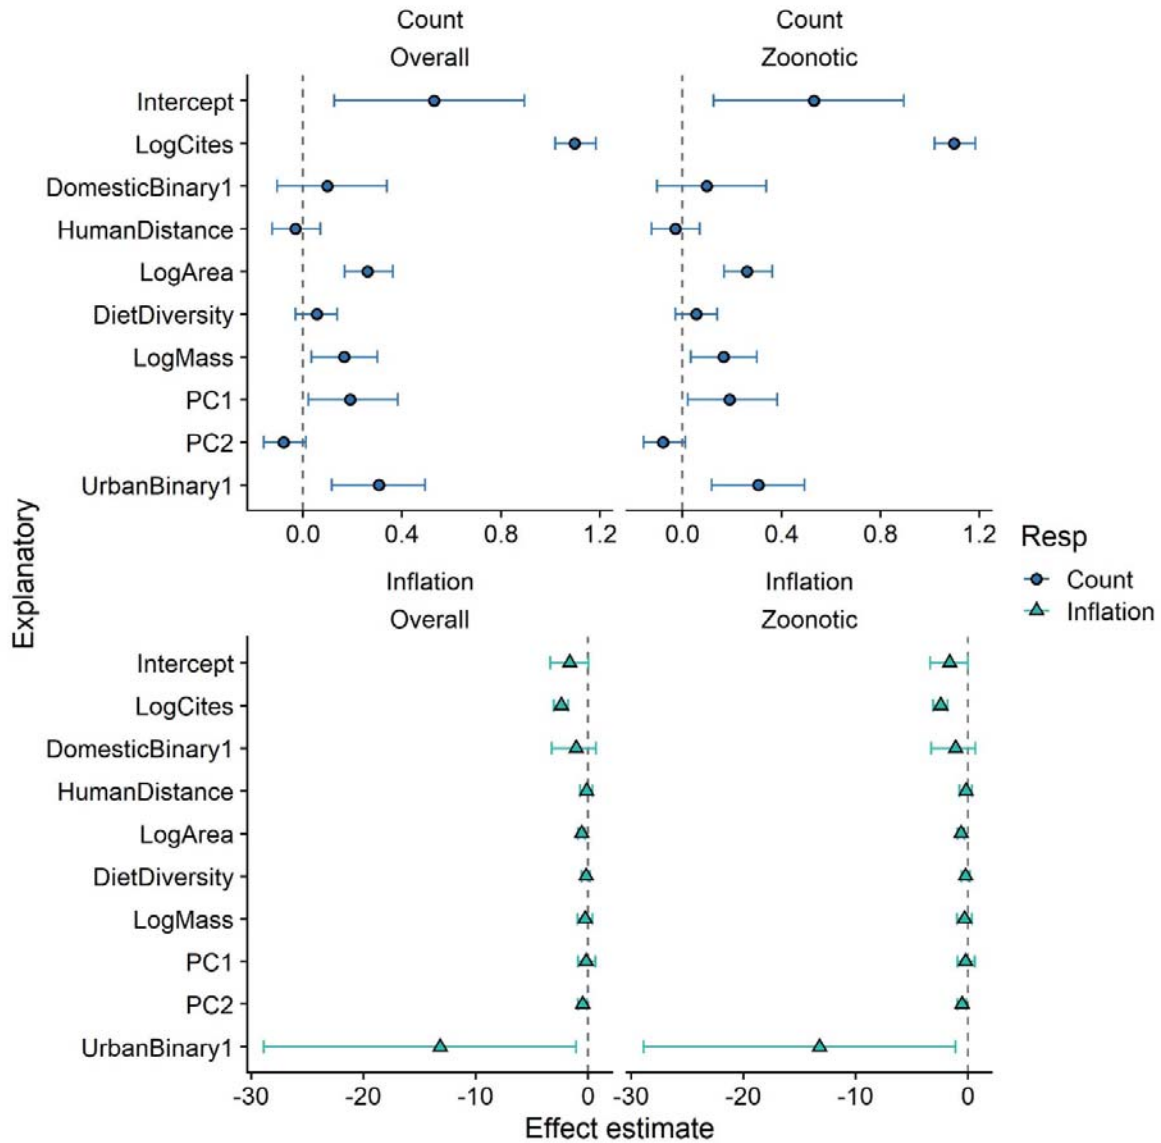

656

657 SIFigure 6: Model effects for all fixed effects in the zero-inflated models for overall parasite  
 658 diversity (left) and zoonotic parasite diversity (right), for both the count components (top) and  
 659 the zero-inflation component (bottom). Points represent the mean of the posterior effect  
 660 estimate distribution; error bars represent the 95% credibility intervals. NB the inflation  
 661 estimates represent the probability that a given species has zero known parasites, so can be  
 662 interpreted as the inverse of the count estimates. Model effects are displayed on the link  
 663 scale. Explanatory variables are described in the methods. LogCites = log(citation number +  
 664 1); DomesticBinary1 = domestic species; HumanDistance = phylogenetic distance from  
 665 humans; LogArea = log(area of IUCN range) in  $\text{KM}^2$ ; DietDiversity = diet diversity; LogMass  
 666 = log(body mass) in kg; PC1 = first principal component of life history traits PCA; PC2 =

667 second principal component of life history traits PCA; UrbanBinary1 = Urban adapted  
668 species.

669

670

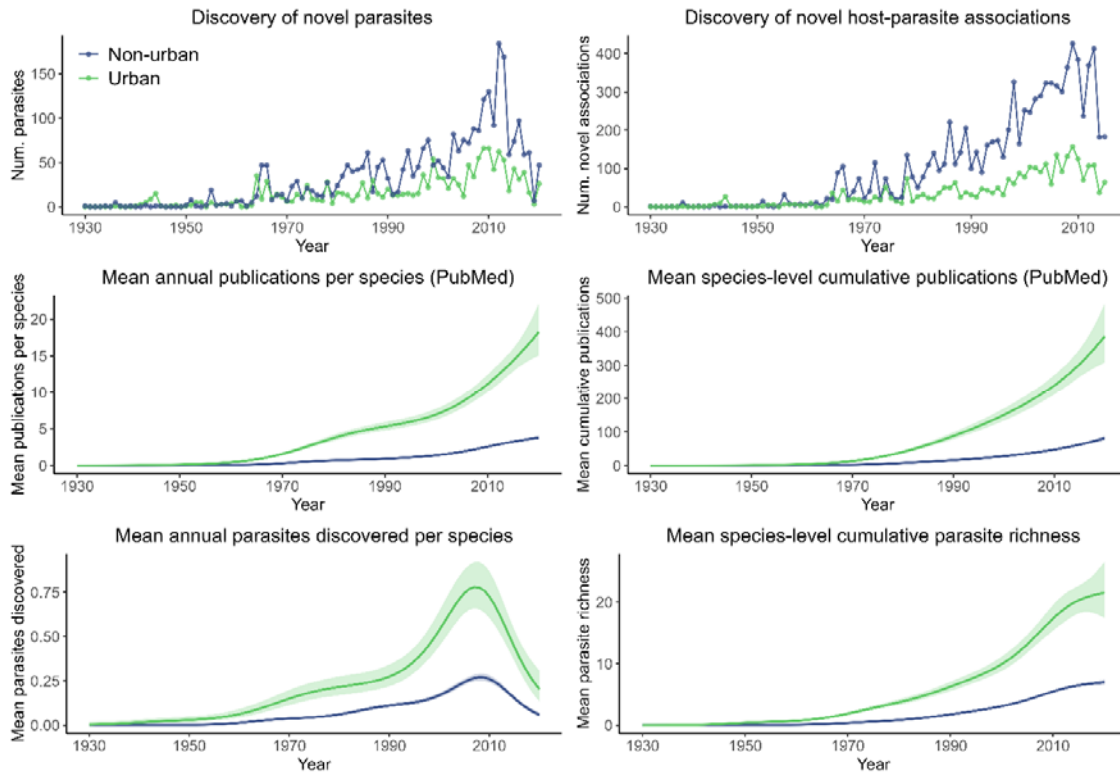

671

672 SIFigure 7: Historical trends in parasite discovery and publication effort across urban-  
673 adapted and non-urban mammals. Top row shows the annual number of novel  
674 parasites (left) discovered in either non-urban (blue) or urban (green) mammal  
675 cohorts, with a novel discovery defined as the first time a particular parasite was  
676 discovered in any species within that group, and the annual number of novel host-  
677 parasite associations (right) discovered among urban and non-urban mammals. The  
678 middle row shows modelled trends in mean species-level annual PubMed-derived  
679 publication counts (left panel) and cumulative publications (right panel) across all urban  
680 ( $n=146$ ) and non-urban host species, estimated via generalised additive models with a  
681 nonlinear effect of year (see Methods). The bottom row shows modelled trends in  
682 mean species level parasite discovery (parasites per year; left panel) and cumulative  
683 parasite richness (right panel) across all urban and non-urban host species.

684

685
